# Supplementary material for: Validation of distal limb mounted inertial measurement unit sensors for stride detection in Warmblood horses at walk and trot
Source: PubMed Central journal article supplement — Equine Vet J. 2016 Dec 13;49(4):545–51. doi: 10.1111/evj.12651 (PMC5484301; doi:10.1111/evj.12651), 2016-12-13
Supplement: EVJ-49-545-s005.pdf [file EVJ-49-545-s005.pdf]

**Supplementary Item 5:**

Stance duration statistics of motion capture (lateral heel and lateral toe markers) versus 'gold standard' force plate (FP; n = 7 horses); Accuracy (ms): the mean difference in milliseconds between IMU and motion capture stance duration accuracy; Precision (ms): the s.d. of the mean difference between the IMU and motion capture stance duration Accuracy; Error (%): the relative mean difference between motion capture and force plate stance duration Accuracy as % of force plate measured stance duration. Accuracy, Precision and Error are deemed better if closer to zero.

|             |             | <b>Stance event</b> | <b>Accuracy (ms)</b> | <b>Precision (ms)</b> | <b>Lower limits of agreement</b> | <b>Upper limits of agreement</b> | <b>Error (%)</b> |
|-------------|-------------|---------------------|----------------------|-----------------------|----------------------------------|----------------------------------|------------------|
| <b>Walk</b> | <b>Fore</b> | Toe-on – Toe-Off    | -31.1                | 57.2                  | -143.3                           | 81.0                             | <b>-4.2 %</b>    |
|             |             | Toe-on – Heel-off   | -136.1               | 51.3                  | -236.6                           | -35.6                            | <b>-17.5 %</b>   |
|             |             | Heel-on – Toe-off   | -22.0                | 21.6                  | -64.4                            | 20.4                             | <b>-2.9 %</b>    |
|             |             | Heel-on –Heel-off   | -127.0               | 25.0                  | -176                             | -78                              | <b>- 16.2%</b>   |
|             | <b>Hind</b> | Toe-on – Toe-off    | -76.1                | 36.0                  | -146.8                           | -5.4                             | <b>-9.9 %</b>    |
|             |             | Toe-on – Heel-off   | -154.8               | 17.6                  | -189.3                           | -120.4                           | <b>-20.1%</b>    |
|             |             | Heel-on – Toe-off   | -41.9                | 48.7                  | -137.3                           | 53.6                             | <b>-5.5 %</b>    |
|             |             | Heel-on –Heel-off   | -120.6               | 21.5                  | -162.7                           | -78.5                            | <b>-15.7%</b>    |
| <b>Trot</b> | <b>Fore</b> | Toe-on – Toe-off    | -38.7                | 23.3                  | -84.4                            | 7.0                              | <b>-11.6 %</b>   |
|             |             | Toe-on – Heel-off   | -91.3                | 15.5                  | -121.6                           | -61.0                            | <b>-27.4%</b>    |
|             |             | Heel-on – Toe-off   | -27.2                | 19.7                  | -65.7                            | 11.3                             | <b>-8.0%</b>     |
|             |             | Heel-on –Heel-off   | -79.9                | 14.5                  | -108.2                           | -51.5                            | <b>- 23.9%</b>   |
|             | <b>Hind</b> | Toe-on – Toe-off    | -41.8                | 25.3                  | -91.3                            | 7.7                              | <b>- 14.0%</b>   |
|             |             | Toe-on – Heel-off   | -93.4                | 8.3                   | -109.7                           | -77.1                            | <b>-31.3%</b>    |
|             |             | Heel-on – Toe-off   | -34.6                | 26.0                  | -85.5                            | 16.4                             | <b>-11.5%</b>    |
|             |             | Heel-on –Heel-off   | -86.2                | 16.4                  | -118.3                           | -54.1                            | <b>- 28.8%</b>   |
